# Supplementary material for: Investigating outcome measures for assessing airway clearance techniques in adults with cystic fibrosis: protocol of a single-centre randomised controlled crossover trial
Source: PubMed Central journal article supplement — BMJ Open Respir Res. 2020 Oct 5;7(1):e000694. doi: 10.1136/bmjresp-2020-000694 (PMC7537140; doi:10.1136/bmjresp-2020-000694), 2020-10-05
Supplement: bmjresp-2020-000694supp001.pdf [file bmjresp-2020-000694supp001.pdf]

**APPENDIX ONE – Effect of Intervention Period Questionnaire**

Participant ID: \_\_\_\_\_ Date: \_\_\_\_\_ Visit No: \_\_\_\_\_

Completed session: **A** or **B****Has the amount of sputum that you would have cleared in the same time period changed by doing this session?**

- Significantly increased
- Slightly increased
- No change
- Slightly decreased
- Significantly decreased

**Has your breathing changed after this session?**

- Significantly easier
- Slightly easier
- No change
- Slightly harder
- Significantly harder
