# Supplementary material for: Investigating outcome measures for assessing airway clearance techniques in adults with cystic fibrosis: protocol of a single-centre randomised controlled crossover trial
Source: PubMed Central journal article supplement — BMJ Open Respir Res. 2020 Oct 5;7(1):e000694. doi: 10.1136/bmjresp-2020-000694 (PMC7537140; doi:10.1136/bmjresp-2020-000694), 2020-10-05
Supplement: bmjresp-2020-000694supp002.pdf [file bmjresp-2020-000694supp002.pdf]

**APPENDIX TWO - Final Evaluation Questionnaire****Final Evaluation Questionnaire**

- 1. Please rank the outcome measures in order of the one that you found the most comfortable to use (1=most comfortable, 5 = least comfortable)**

Lung Function \_\_\_\_\_ Electrical Impedance Tomography \_\_\_\_\_  
Lung Clearance Index \_\_\_\_\_ Impulse Oscillation System \_\_\_\_\_  
Sputum cleared \_\_\_\_\_

- 2. Please rank the outcome measure test in terms of which you found the easiest to perform (1= most easy, 5 = least easy)**

Lung Function \_\_\_\_\_ Electrical Impedance Tomography \_\_\_\_\_  
Lung Clearance Index \_\_\_\_\_ Impulse Oscillation System \_\_\_\_\_  
Sputum cleared \_\_\_\_\_

- 3. a) Please rank the outcome measures in terms of which one you would you prefer to use for regular assessments (1 = most preferred, 5 = least preferred)**

Lung Function \_\_\_\_\_ Electrical Impedance Tomography \_\_\_\_\_  
Lung Clearance Index \_\_\_\_\_ Impulse Oscillation System \_\_\_\_\_  
Sputum cleared \_\_\_\_\_

**b) Please try to explain your choice**

---

---

---

---

---

**4. Any Further Comments?**

---

---

---

---

---

---

---

---

---

---

**Thank you for your time and feedback**
